# Supplementary material
Source: publisher figshare collection journal article supplement (https://brill.figshare.com/ndownloader/files/36476481)
Supplement: Supplementary file 1 [file 36476481]

## Sheet: Supplementary Table S1
Subfamily	Species	Author	Tribe	Sample ID	Locality2	Locality3	COI	CAD(part1)	CAD(part2)	RPS5	EF1a
Glaphyriinae	Evergestis_holophaealis	(Hampson, 1913)		P19-74	Tottori	Yazu	LC697956	LC698123	LC698624	LC698849
Heliothelinae	Heliothela_nigralbata	Leech, 1889		P19-70	Yamaguchi	Akiyoshidai	LC697953	LC698121	LC698622		LC699096
Lathrotelinae	Acropentias_aureus	(Butler, 1878)		P18-24	Tottori	Hyonosen	LC697888	LC698079	LC698556	LC698868	LC699044
Lathrotelinae	Sufetula_sunidesalis	Walker, 1859		P17-105	Tottori	Hyonosen	LC697836	LC698052	LC698175	LC698719	LC698914
Odontiinae	Clupeosoma_cinerea	(Warren, 1892)		M21-017	Tottori	Kokufu	LC697793		LC698134	LC698680	LC698874
Pyraustinae	Aglaops_aurantialis	(Munroe & Mutuura, 1968)	Pyraustini	P17-007	Okinawa	Okinawa Is.	LC697797	LC698019	LC698136	LC698684	LC698878
Pyraustinae	Aglaops_genialis	(Leech, 1889)	Pyraustini	P17-124	Fukuoka	Hiraodai	LC697846	LC698060	LC698188	LC698730	LC699111
Pyraustinae	Agraops_albipennis	(Inoue, 2000)	Pyraustini	P18-78	Shimane	Taisha	LC697919		LC698589		LC699071
Pyraustinae	Anania_albeoverbascalis	Yamanaka, 1966	Pyraustini	P17-067	Nagano	Kiso	LC697824	LC698044	LC698163	LC698711	LC698905
Pyraustinae	Anania_delicatalis	(South, 1901)	Pyraustini	P18-67	Tottori	Yazu	LC697916		LC698586	LC698814	LC699068
Pyraustinae	Anania_funebris	(Ström, 1768)	Pyraustini	P18-21	Hokkaido	Sapporo	LC697885	LC698077	LC698553	LC698784	LC699041
Pyraustinae	Anania_hortulata	(Linnaeus, 1758)	Pyraustini	P17-057	Hokkaido	Kitami	LC697817	LC698037	LC698156	LC698705	LC698898
Pyraustinae	Anania_lancealis	(Denis & Schiffermüller, 1775)	Pyraustini	P17-157	Nagano	Saku	LC697858	LC698066	LC698197	LC698739	LC699137
Pyraustinae	Anania_luctualis	(Hübner, 1793)	Pyraustini	P17-075	Gifu	Hirayu	LC697826	LC698046	LC698165	LC698713
Pyraustinae	Anania_ocellalis	(Munroe & Mutuura, 1969)	Pyraustini	P17-014	Nagano	Azusayama	LC697798	LC698020	LC698137	LC698685	LC698879
Pyraustinae	Anania_stachydalis	(Germar, 1821)	Pyraustini	P17-031	Hokkaido	Shibecha	LC697810	LC698029	LC698149	LC698697	LC698890
Pyraustinae	Anania_terrealis	(Treitschke, 1829)	Pyraustini	P17-082	Tottori	Hyonosen	LC697829	LC698049	LC698168		LC698909
Pyraustinae	Anania_verbascalis	(Denis & Schiffermüller, 1775)	Pyraustini	P18-66	Nagasaki	Tsushima Is.	LC697915	LC698100	LC698585	LC698813	LC699067
Pyraustinae	Anania_vicinalis	(South, 1901)	Pyraustini	P17-032	Tottori	Hyonosen	LC697811	LC698030	LC698150	LC698698	LC698891
Pyraustinae	Aurorobotys_aurorina	(Butler, 1878)	unplaced	P17-151	Tottori	Wakabadai	LC697853	LC698064		LC698735	LC698927
Pyraustinae	Carminibotys_carminalis	(Caradja, 1925)	unplaced	P17-029	Tottori	Daisen	LC697808	LC698027	LC698147	LC698695	LC698888
Pyraustinae	Chobera_amamiale	(Munroe & Mutuura, 1968)	Pyraustini	P19-09	Okinawa	Okinawa Is.	LC697926		LC698596	LC698822	LC699076
Pyraustinae	Circobotys_aurealis	(Leech, 1889)	Pyraustini	P19-12	Tottori	Sourokubara	LC697929		LC698598	LC698825	LC699079
Pyraustinae	Circobotys_heterogenalis	(Bremer, 1864)	Pyraustini	P19-62	Shizuoka	Asagiri-kogen	LC697951		LC698620	LC698847	LC699128
Pyraustinae	Circobotys_nycterina	Butler, 1879	Pyraustini	P17-158	Tottori	Kawaidani	LC697859		LC698198	LC698740	LC698932
Pyraustinae	Daulia_nr._afralis		Pyraustini	P19-77	Tottori	Hyonosen	LC697958		LC698626	LC698851	LC699130
Pyraustinae	Demobotys_pervulgalis	(Hampson, 1913)	Pyraustini	M21-011	Hyogo	Takasago	LC652646		LC698133	LC698679	LC698873
Pyraustinae	Ecpyrrhorrhoe_minnehaha	(Pryer, 1877)	Pyraustini	P17-130	Hokkaido	Tomakomai	LC697850		LC698191	LC698733	LC699113
Pyraustinae	Ecpyrrhorrhoe_puralis	(South, 1901)	Pyraustini	P18-43	Tottori	Iwami	LC697899		LC698570	LC698798	LC699119
Pyraustinae	Ecpyrrhorrhoe_rubiginalis	(Hübner, 1796)	Pyraustini	P17-028	Fukuoka	Hiraodai	LC697807	LC698026	LC698146	LC698694	LC698887
Pyraustinae	Hyalobathra_illectalis	(Walker, 1859)	Portentomorphini	P17-175	Okinawa	Iriomote Is.	LC697870		LC698208	LC698750	LC698939
Pyraustinae	Hyalobathra_undulinea	(Hampson, 1891)	Portentomorphini	P19-60	Okinawa	Ishigaki Is.	LC697949	LC698119	LC698618	LC698845	LC699094
Pyraustinae	Lamprophaia_albifimbrialis	(Walker, 1866)	Pyraustini	P20-15	Okinawa	Ishigaki Is.	LC697968		LC698636		LC699132
Pyraustinae	Loxostege_aeruginalis	(Hübner, 1796)	Pyraustini	P18-28	Hokkaido	Kamoenai	LC697890		LC698559	LC698789	LC699047
Pyraustinae	Loxostege_sticticalis	(Linnaeus, 1761)	Pyraustini	P18-27	Hokkaido	Shikishimanai	LC697889		LC698558	LC698788	LC699046
Pyraustinae	Mabra_eryxalis	(Walker, 1859)	Portentomorphini	P19-52	Okinawa	Ishigaki Is.	LC697944		LC698614	LC698840
Pyraustinae	Nascia_cilialis	(Hübner, 1796)	Pyraustini	P17-061	Hokkaido	Kiritappu	LC697820	LC698040	LC698159	LC698707	LC698901
Pyraustinae	Nomis_albopedalis	Motschulsky, 1861	Pyraustini	P18-02	Tottori	Yazu	LC697873		LC698212	LC698754	LC698942
Pyraustinae	Ostrinia_furnacalis	(Guenée, 1854)	unplaced	P18-62	Tottori	Tottori	LC697912	LC698097	LC698582	LC698810	LC699065
Pyraustinae	Ostrinia_latipennis	(Warren, 1892)	unplaced	P17-064	Hokkaido	Tokachi	LC697822	LC698042	LC698161	LC698709	LC698903
Pyraustinae	Ostrinia_nr._zaguliaevi	Tabata et al., 2008	unplaced	P20-31	Tottori	Tottori	LC697974	LC698130	LC698642	LC698862
Pyraustinae	Ostrinia_orientalis	Mutuura & Munroe, 1970	unplaced	P19-42	Tottori	Saji	LC697939	LC698115	LC698609	LC698836	LC699088
Pyraustinae	Ostrinia_scapulalis	(Walker, 1859)	unplaced	P19-61	Tottori	Tottori	LC697950	LC698120	LC698619	LC698846	LC699095
Pyraustinae	Ostrinia_zaguliaevi	Mutuura & Munroe, 1970	unplaced	P17-182	Nagano	Takabocchi	LC697872	LC698069	LC698210	LC698752	LC698940
Pyraustinae	Ostrinia_zealis	Guenée, 1852	unplaced	P20-26	Tottori	Kokufu	LC697973		LC698641	LC698861
Pyraustinae	Pagyda_arbiter	(Butler, 1879)	Pyraustini	P18-08	Tottori	Sourokubara	LC697876		LC698214	LC698757
Pyraustinae	Pagyda_quadrilineata	Butler, 1881	Pyraustini	P20-21	Tottori	Tottori	LC697971	LC698129	LC698639	LC698860	LC699107
Pyraustinae	Pagyda_quinquelineata	Hering, 1903	Pyraustini	P19-13	Ehime	Omogokei	LC697930	LC698108	LC698599	LC698826	LC699080
Pyraustinae	Paranomis_sidemialis	Munroe & Mutuura, 1968	Pyraustini	P17-058	Tottori	Hyonosen	LC697818	LC698038	LC698157		LC698899
Pyraustinae	Paratalanta_cultralis	(Staudinger, 1867)	Pyraustini	P17-063	Nagano	Takabocchi	LC697821	LC698041	LC698160	LC698708	LC698902
Pyraustinae	Paratalanta_pandalis	(Hübner, 1825)	Pyraustini	P18-64	Hokkaido	Kitami	LC697913	LC698098	LC698583	LC698811
Pyraustinae	Paratalanta_taiwanensis	Yamanaka, 1972	Pyraustini	P17-072	Tottori	Hyonosen	LC697825	LC698045	LC698164	LC698712	LC698906
Pyraustinae	Pyrausta_aurata	(Scopoli)	Pyraustini	P17-080	Hokkaido	Sounkyo	LC697828	LC698048	LC698167	LC698865	LC698908
Pyraustinae	Pyrausta_contigualis	South, 1901	Pyraustini	P17-027	Fukuoka	Hiraodai	LC697806		LC698145	LC698693	LC698886
Pyraustinae	Pyrausta_limbata	(Butler, 1879)	Pyraustini	P19-75	Tottori	Yazu	LC697957		LC698625	LC698850	LC699098
Pyraustinae	Pyrausta_mutuurai	Inoue, 1982	Pyraustini	P19-33	Tottori	Senjozan	LC697936		LC698606	LC698833
Pyraustinae	Pyrausta_phoenicealis	(Hübner, 1818)	Pyraustini	P18-05	Tottori	Tottori	LC697875		LC698213	LC698756	LC698944
Pyraustinae	Pyrausta_simplicealis	(Bremer, 1864)	Pyraustini	P18-81	Tottori	Hirodomeno	LC697921		LC698591	LC698818	LC699124
Pyraustinae	Pyrausta_unipunctata	Butler, 1881	Pyraustini	P19-69	Hyogo	Hachikita	LC697952		LC698621
Pyraustinae	Sclerocona_acutellus	(Eversmann, 1842)	Pyraustini	P17-047	Hokkaido	Takkobu	LC697814	LC698033	LC698152	LC698701	LC698894
Pyraustinae	Sitochroa_palealis	(Denis & Schiffermüller, 1775)	Pyraustini	P18-55	Nagano	Takabocchi	LC697909		LC698579	LC698807	LC699062
Pyraustinae	Sitochroa_umbrosalis	(Warren, 1892)	Pyraustini	P17-053	Tottori	Daisen	LC697816	LC698036	LC698155	LC698704	LC698897
Pyraustinae	Sitochroa_verticalis	(Linnaeus, 1758)	Pyraustini	P18-76	Tottori	Daisen	LC697918	LC698102	LC698588	LC698816	LC699070
Pyraustinae	Tetridia_caletoralis	(Walker, 1859)	unplaced	P19-11	Okinawa	Ishigaki Is.	LC697928	LC698107	LC698597	LC698824	LC699078
Pyraustinae	Torulisquama_evenoralis	(Walker, 1859)	Pyraustini	P19-18	Tottori	Saji	LC697932	LC698109	LC698601	LC698828
Pyraustinae	Uresiphita_prunipennis	(Butler, 1879)	unplaced	P18-69	Fukuoka	Hiraodai	LC697917	LC698101	LC698587	LC698815	LC699069
Pyraustinae	Yezobotys_dissimilis	(Yamanaka, 1958)	Pyraustini	P20-62	Shimane	Kisuki	LC697977	LC698132		LC698864	LC699135
Spilomelinae	Aethaloessa_calidalis	(Guenée, 1854)	Spilomelini	P18-42	Okinawa	Okinawa Is.	LC697898	LC698089	LC698569	LC698797	LC699056
Spilomelinae	Agrioglypta_eurytusalis	(Walker, 1859)	Margaroniini	P18-52	Okinawa	Ishigaki Is.	LC697907	LC698094			LC699060
Spilomelinae	Agrioglypta_itysalis	(Walker, 1859)	Margaroniini	P17-121	Okinawa	Ishigaki Is.		LC698059	LC698185		LC698921
Spilomelinae	Agrotera_nemoralis	(Scopoli, 1763)	Agroterini	P18-54	Tottori	Hirodomeno	LC697908	LC698015	LC698578	LC698806	LC699061
Spilomelinae	Analyta_apicalis	(Hampson, 1896)	Margaroniini	P17-100	Okinawa	Ishigaki Is.	LC697834		LC698173	LC698717
Spilomelinae	Bocchoris_inspersalis	(Zeller, 1852)	Nomophilini	P18-03	Tottori	Yazu	LC697874	LC698070		LC698755	LC698943
Spilomelinae	Botyodes_diniasalis	(Walker, 1859)	Margaroniini	P18-38	Tottori	Tottori	LC697894	LC698085	LC698565	LC698793	LC699052
Spilomelinae	Botyodes_principalis	Leech, 1889	Margaroniini	P18-34	Tottori	Sourokubara	LC697893	LC698084	LC698564	LC698792	LC699118
Spilomelinae	Bradina_atopalis	(Walker, 1858)	Steniini	P20-56	Tottori	Tottori	LC697976		LC698644	LC698863	LC699109
Spilomelinae	Bradina_erilitoides	Strand, 1919	Steniini	P18-18	Tottori	Yazu	LC697883	LC698076	LC698551	LC698762	LC698950
Spilomelinae	Caldubotys_caldusalis	(Walker, 1859)	Margaroniini	P19-48	Okinawa	Ishigaki Is.	LC697941		LC698611	LC698838	LC699090
Spilomelinae	Camptomastix_hisbonalis	(Walker, 1859)	Steniini	P17-026	Kagoshima	Amami Is.	LC697805	LC698025	LC698144	LC698692	LC698885
Spilomelinae	Camptomastix_septentrionalis	Inoue, 1982	Steniini	P17-025	Tottori	Tottori	LC697804	LC698024	LC698143	LC698691	LC698884
Spilomelinae	Ceratarcha_umbrosa	Swinhoe, 1894	Spilomelini	P17-123	Okinawa	Ishigaki Is.	LC697845		LC698187	LC698729	LC698923
Spilomelinae	Chabula_telphusalis	(Walker, 1859)	Margaroniini	P17-116	Tottori	Wakabadai	LC697842		LC698183	LC698727	LC699110
Spilomelinae	Charitoprepes_lubricosa	Warren, 1896	Margaroniini	P17-015	Hyogo	Sayo	LC697799	LC698021	LC698138	LC698686	LC698880
Spilomelinae	Cirrhochrista_kosemponialis	Strand, 1918	Margaroniini	P17-113	Okinawa	Ishigaki Is.	LC697840	LC698057	LC698181	LC698725	LC698919
Spilomelinae	Cnaphalocrocis_medinalis	(Guenée, 1854)	Spilomelini	P17-003	Okinawa	Okinawa Is.	LC697795	LC698017	LC698135	LC698682	LC698876
Spilomelinae	Cnaphalocrocis_stereogona	(Meyrick, 1886)	Spilomelini	P20-51	Tottori	Tottori	LC697975	LC698131	LC698643		LC699108
Spilomelinae	Conogethes_punctiferalis	(Guenée, 1854)	Margaroniini	P19-23	Tottori	Saji	LC697935	LC698112	LC698604	LC698831	LC699083
Spilomelinae	Cotachena_nr._alysoni		Wurthiini	P17-033	Tottori	Saji	LC697812	LC698031	LC698645	LC698699	LC698892
Spilomelinae	Cydalima_perspectalis	(Walker, 1859)	Margaroniini	M21-022	Okayama	Takahashi	LC697794			LC698681	LC698875
Spilomelinae	Diaphania_indica	(Saunders, 1851)	Margaroniini	P19-57	Tottori	Tottori	LC697947	LC698117	LC698616	LC698843	LC699127
Spilomelinae	Diasemia_accalis	(Walker, 1859)	Nomophilini	P20-23	Tottori	Yazu	LC697972		LC698640
Spilomelinae	Diasemia_reticularis	(Linnaeus, 1761)	Nomophilini	P17-154	Shimane	Okuizumo	LC697856		LC698195	LC698737	LC698930
Spilomelinae	Dolicharthria_charonialis	(Walker, 1859)	Steniini	P18-46	Tottori	Daisen	LC697902	LC698092	LC698573	LC698801	LC699121
Spilomelinae	Eurrhyparodes cf. bracteonalis	(Zeller, 1852)	Herpetogrammatini	P18-45	Tottori	Yazu	LC697901	LC698091	LC698572	LC698800	LC699120
Spilomelinae	Glauconoe_deductalis	(Walker, 1859)	Margaroniini	P19-50	Okinawa	Ishigaki Is.	LC697942		LC698612	LC698839	LC699091
Spilomelinae	Glycythyma_chrysorycta	(Meyrick, 1884)	Steniini	P17-024	Yamaguchi	Yamaguchi	LC697803	LC698023	LC698142	LC698690	LC698883
Spilomelinae	Glyphodes_duplicalis	Inoue, Munroe & Mutuura, 1981	Margaroniini	P17-129	Fukuoka	Hiraodai	LC697849	LC698063	LC698190	LC698732	LC698925
Spilomelinae	Glyphodes_nr._actorionalis		Margaroniini	P17-167	Okinawa	Iriomote Is.	LC697864		LC698203		LC699116
Spilomelinae	Glyphodes_nr._bivitralis		Margaroniini	P19-71	Okinawa	Ishigaki Is.	LC697954	LC698122			LC699097
Spilomelinae	Glyphodes_nr._onychinalis		Margaroniini	P17-089	Shizuoka	Asagiri-kogen	LC697830	LC698010	LC698169		LC698910
Spilomelinae	Glyphodes_pryeri	Butler, 1879	Margaroniini	P18-12	Hokkaido	Otaru	LC697878		LC698546	LC698758	LC698946
Spilomelinae	Glyphodes_pyloalis	Walker, 1859	Margaroniini	P17-173	Kagoshima	Amami Is.	LC697868		LC698206	LC698748
Spilomelinae	Glyphodes_quadrimaculalis	(Bremer & Grey, 1853)	Margaroniini	P18-50	Tottori	Tottori	LC697906		LC698577	LC698805	LC699123
Spilomelinae	Goniorhynchus_butyrosa	(Butler, 1879)	unplaced	P18-47	Tottori	Saji	LC697903		LC698574	LC698802	LC699122
Spilomelinae	Goniorhynchus_exemplaris	Hampson, 1898	unplaced	P18-48	Tottori	Yazu	LC697904		LC698575	LC698803	LC699058
Spilomelinae	Haritalodes_basipunctalis	(Bremer, 1864)	Agroterini	P18-32	Ibaraki	Tsukuba	LC597451	LC698082	LC698562	LC698869	LC699050
Spilomelinae	Haritalodes_derogata	(Fabricius, 1775)	Agroterini	P18-33	Ibaraki	Tsukuba	LC697892	LC698083	LC698563	LC698870	LC699051
Spilomelinae	Hemopsis_nr._dissipatalis		unplaced	P18-80	Tottori	Saji	LC697920	LC698103	LC698590	LC698817	LC699072
Spilomelinae	Herpetogramma_fuscescens	(Warren, 1892)	Herpetogrammatini	P17-092	Tottori	Yazu	LC697831	LC698050	LC698170	LC698714	LC698911
Spilomelinae	Herpetogramma_licarsisalis	(Walker, 1859)	Herpetogrammatini	P17-110	Yamaguchi	Akiyoshidai	LC697838	LC698056	LC698179	LC698723	LC698917
Spilomelinae	Herpetogramma_luctuosalis	(Guenée, 1854)	unplaced	P18-65	Fukuoka	Shioji-yama	LC697914	LC698099	LC698584	LC698812	LC699066
Spilomelinae	Herpetogramma_moderatalis	Christoph, 1881	Herpetogrammatini	P17-111	Tottori	Yazu	LC697839		LC698180	LC698724	LC698918
Spilomelinae	Herpetogramma_phaeopteralis	(Guenée, 1854)	Herpetogrammatini	P17-109	Okinawa	Kuroshima Is.	LC697837	LC698055	LC698178	LC698722	LC698916
Spilomelinae	Herpetogramma_rudis	(Warren, 1892)	Herpetogrammatini	P17-050	Shizuoka	Asagiri-kogen	LC697815	LC698034	LC698153	LC698702	LC698895
Spilomelinae	Herpetogramma_submarginalis	(Swinhoe, 1901)	Herpetogrammatini	P19-07	Okinawa	Okinawa Is.	LC697925	LC698105	LC698595	LC698821	LC699075
Spilomelinae	Hydriris_ornatalis	(Duponchel, 1832)	Hydriini	P19-01	Okinawa	Okinawa Is.	LC697922		LC698592
Spilomelinae	Hymenia_perspectalis	(Hübner, 1796)	Hymeniini	P19-83	Okinawa	Ishigaki Is.	LC697959		LC698627	LC698852	LC699099
Spilomelinae	Lipararchis_tranquillalis	(Lederer, 1863)	unplaced	P17-171	Okinawa	Iriomote Is.	LC697866		LC698204	LC698746	LC699117
Spilomelinae	Loxocorys_sericea	(Butler, 1879)	Wurthiini	P18-14	Tottori	Iwami	LC697880	LC698073	LC698548	LC698760
Spilomelinae	Lygropia_yerburii	(Butler, 1886)	Herpetogrammatini	P17-163	Tottori	Hirodomeno	LC697861		LC698200	LC698742	LC698934
Spilomelinae	Marasmia_poeyalis	(Boisduval, 1833)	Spilomelini	P19-39	Okinawa	Ishigaki Is.	LC697938	LC698114	LC698608	LC698835	LC699087
Spilomelinae	Maruca_amboinalis	(Felder & Rogenhofer, 1875)	Margaroniini	P19-20	Okinawa	Ishigaki Is.	LC697933	LC698110	LC698602	LC698829	LC699125
Spilomelinae	Maruca_vitrata	(Fabricius, 1787)	Margaroniini	P19-54	Tottori	Yazu	LC697945	LC698116	LC698615	LC698841	LC699092
Spilomelinae	Massepha_ohbai	Yoshiyasu, 1990	Spilomelini	P20-03	Tottori	Shikano	LC697961		LC698629	LC698854	LC699101
Spilomelinae	Mecyna_flavalis	(Denis & Schiffermüller, 1775)	Nomophilini	P18-40	Nagano	Sugadaira	LC697896	LC698087	LC698567	LC698795	LC699054
Spilomelinae	Mecyna_gracilis	(Butler, 1879)	Nomophilini	P17-060	Fukuoka	Hiraodai	LC697819	LC698039	LC698158	LC698706	LC698900
Spilomelinae	Mecyna_suffusalis	(Warren, 1892)	Nomophilini	P18-16	Hokkaido	Kamoenai	LC697882	LC698075	LC698550		LC698949
Spilomelinae	Mecyna_tricolor	(Butler, 1879)	unplaced	P19-17	Tottori	Saji	LC697931	LC698016	LC698600	LC698827	LC699081
Spilomelinae	Metasia_coniotalis	Hampson, 1903	Steniini	P17-127	Fukuoka	Hiraodai	LC697848	LC698062			LC698924
Spilomelinae	Metoeca_foedalis	(Guenée, 1854)	Herpetogrammatini	P17-166	Kagoshima	Amami Is.	LC697863		LC698202	LC698744	LC699115
Spilomelinae	Nacoleia_charesalis	(Walker, 1859)	Steniini	P18-61	Okinawa	Ishigaki Is.	LC697911	LC698096	LC698581	LC698809	LC699064
Spilomelinae	Nacoleia_commixta	(Butler, 1879)	Steniini	P20-16	Tottori	Sourokubara	LC697969		LC698637	LC698859	LC699133
Spilomelinae	Nacoleia_inouei	Yamanaka, 1980	Steniini	P17-021	Shimane	Okuizumo	LC697800		LC698139	LC698687
Spilomelinae	Nacoleia_satsumalis	South, 1901	Steniini	P17-022	Tottori	Tottori	LC697801		LC698140	LC698688	LC698881
Spilomelinae	Nacoleia_sibirialis	(Millière, 1879)	Steniini	P19-73	Shizuoka	Asagiri-kogen	LC697955			LC698848
Spilomelinae	Nacoleia_tampiusalis	(Walker, 1859)	Steniini	P17-023	Tottori	Hyonosen	LC697802	LC698022	LC698141	LC698689	LC698882
Spilomelinae	Nagiella_inferior	(Hampson, 1899)	Agroterini	P17-183	Shimane	Kusandao	LC527428	LC698013	LC698211	LC698753	LC698941
Spilomelinae	Nagiella_quadrimaculalis	(Kollar & Redtenbacher, 1844)	Agroterini	P17-107	Tottori	Daisen	LC527424	LC698054	LC698177	LC698721	LC699136
Spilomelinae	Nagiella_tristalis	Matsui & Naka, 2021	Agroterini	P17-106	Tottori	Sourokubara	LC527426	LC698053	LC698176	LC698720	LC698915
Spilomelinae	Nevrina_procopia	(Stoll, 1781)	Margaroniini	P17-170	Kagoshima	Amami Is.	LC697865			LC698745	LC698936
Spilomelinae	Nomophila_noctuella	(Denis & Schiffermüller, 1775)	Nomophilini	P18-49	Tottori	Tottori	LC697905	LC698093	LC698576	LC698804	LC699059
Spilomelinae	Nosophora_maculalis	(Leech, 1889)	Agroterini	P20-12	Tottori	Yazu	LC697965	LC698126	LC698633	LC698858	LC699106
Spilomelinae	Nosophora_semitritalis	(Lederer, 1863)	Agroterini	P17-165	Tottori	Tottori	LC697862		LC698201	LC698743	LC698935
Spilomelinae	Omiodes_decisalis	(Walker, 1866)	Margaroniini	P19-87	Okinawa	Okinawa Is.	LC697960		LC698628	LC698853	LC699100
Spilomelinae	Omiodes_indicata	(Fabricius, 1775)	Margaroniini	P19-55	Hyogo	Akou	LC697946			LC698842
Spilomelinae	Omiodes_indistincta	(Warren, 1892)	Margaroniini	P18-56	Tottori	Hirodomeno	LC697910	LC698095	LC698580	LC698808	LC699063
Spilomelinae	Omiodes_misera	(Butler, 1879)	Margaroniini	P18-41	Tottori	Yazu	LC697897	LC698088	LC698568	LC698796	LC699055
Spilomelinae	Omiodes_nipponalis	Yamanaka, 2005	Margaroniini	P17-095	Tottori	Yazu	LC697832		LC698171	LC698715	LC698912
Spilomelinae	Omiodes_noctescens	(Moore, 1888)	Margaroniini	P20-09	Tottori	Sourokubara	LC697962		LC698631	LC698855	LC699103
Spilomelinae	Omphisa_anastomosalis	(Guenée, 1854)	Margaroniini	P19-51	Okinawa	Iriomote Is.	LC697943		LC698613		LC699126
Spilomelinae	Orphanostigma_abruptalis	(Walker, 1859)	Spilomelini	P19-37	Okinawa	Ishigaki Is.	LC697937		LC698607	LC698834	LC699085
Spilomelinae	Pachynoa_sabelialis	(Guenée, 1854)	Margaroniini	P20-10	Okinawa	Okinawa Is.	LC697963	LC698124	LC698647	LC698856	LC699104
Spilomelinae	Palpita_inusitata	(Butler, 1879)	Margaroniini	P17-119	Nagasaki	Tsushima Is.	LC697843	LC698058	LC698184	LC698728	LC698920
Spilomelinae	Palpita_nigropunctalis	(Bremer, 1864)	Margaroniini	P17-115	Okinawa	Ishigaki Is.	LC697841		LC698182	LC698726
Spilomelinae	Paranacoleia_lophophoralis	(Hampson, 1912)	Agroterini	P17-122	Okinawa	Ishigaki Is.	LC697844	LC698011	LC698186	LC698866	LC698922
Spilomelinae	Patania_balteata	(Fabricius, 1798)	Agroterini	P18-31	Tottori	Sourokubara	LC597459	LC698081	LC698561	LC698791	LC699049
Spilomelinae	Patania_brevipennis	(Inoue, 1982)	Agroterini	P17-156	Shimane	Okuizumo	LC697857	LC698065	LC698196	LC698738	LC698931
Spilomelinae	Patania_characteristica	(Warren, 1896)	Agroterini	P17-174	Kagoshima	Amami Is.	LC697869	LC698068	LC698207	LC698749	LC698938
Spilomelinae	Patania_chlorophanta	(Butler, 1878)	Agroterini	P18-26	Tottori	Sourokubara	LC597458	LC698080	LC698557	LC698787	LC699045
Spilomelinae	Patania_deficiens	(Moore, 1887)	Spilomelini	P18-30	Tottori	Hirodomeno	LC697891		LC698560	LC698790	LC699048
Spilomelinae	Patania_expictalis	(Christoph, 1881)	Agroterini	P17-152	Tottori	Kawaidani	LC697854		LC698194	LC698736	LC698928
Spilomelinae	Patania_harutai	(Inoue, 1955)	Agroterini	P19-26	Hyogo	Ueyama-kogen	LC597455	LC698113	LC698605	LC698832	LC699084
Spilomelinae	Patania_plagiatalis	(Walker, 1859)	Agroterini	P17-005	Okinawa	Okinawa Is.	LC697796	LC698018		LC698683	LC698877
Spilomelinae	Patania_punctimarginalis	(Hampson, 1896)	Agroterini	P18-10	Tottori	Tottori	LC697877	LC698071	LC698215	LC698867	LC698945
Spilomelinae	Patania_ruralis	(Scopoli, 1763)	Agroterini	P17-052	Tottori	Hashimoto	LC527431	LC698035	LC698154	LC698703	LC698896
Spilomelinae	Patania_sabinusalis	(Walker, 1859)	Agroterini	P17-172	Okinawa	Iriomote Is.	LC697867	LC698067	LC698205	LC698747	LC698937
Spilomelinae	Patania_scinisalis	(Walker, 1859)	Agroterini	P17-139	Kagoshima	Satsuma	LC697851		LC698192	LC698734	LC699114
Spilomelinae	Patania_ultimalis	(Walker, 1859)	Agroterini	P17-126	Tottori	Azo	LC697847	LC698061	LC698189	LC698731	LC699112
Spilomelinae	Patania_verecunda	(Warren, 1896)	Agroterini	P20-11	Kagoshima	Amami Is.	LC697964	LC698125	LC698632	LC698857	LC699105
Spilomelinae	Piletocera_aegimiusalis	(Walker, 1859)	Steniini	P18-39	Tottori	Azo	LC697895	LC698086	LC698566	LC698794	LC699053
Spilomelinae	Piletocera_sodalis	(Leech, 1889)	Steniini	P19-21	Tottori	Sourokubara	LC697934	LC698111	LC698603	LC698830	LC699082
Spilomelinae	Polythlipta_liquidalis	Leech, 1889	Margaroniini	P17-153	Tottori	Hirodomeno	LC697855	LC698012		LC698872	LC698929
Spilomelinae	Preneopogon_catenalis	(Wileman, 1911)	Spilomelini	P19-04	Okinawa	Okinawa Is.	LC697924		LC698594	LC698820	LC699074
Spilomelinae	Prophantis_adusta	Inoue, 1986	Trichaeini	P19-03	Okinawa	Okinawa Is.	LC697923	LC698104	LC698593	LC698819	LC699073
Spilomelinae	Protonoceras_capitalis	(Fabricius, 1794)	Nomophilini	P17-178	Okinawa	Iriomote Is.	LC697871		LC698209	LC698751
Spilomelinae	Pseudebulea_fentoni	Butler, 1881	Wurthiini	P18-20	Hokkaido	Sapporo	LC697884	LC698014	LC698552	LC698763	LC698951
Spilomelinae	Pycnarmon_lactiferalis	(Walker, 1859)	Spilomelini	P17-159	Tottori	Kawaidani	LC697860		LC698199	LC698741	LC698933
Spilomelinae	Pycnarmon_pantherata	(Butler, 1878)	Agroterini	P17-098	Tottori	Hirodomeno	LC697833		LC698172	LC698716
Spilomelinae	Pygospila_tyres	(Cramer, 1779)	Margaroniini	P17-066	Nagano	Yunomaru	LC697823	LC698043	LC698162	LC698710	LC698904
Spilomelinae	Rehimena_surusalis	(Walker, 1859)	Agroterini	P18-44	Tottori	Tottori	LC697900	LC698090	LC698571	LC698799	LC699057
Spilomelinae	Sameodes_cancellalis	(Zeller, 1852)	Nomophilini	P19-46	Okinawa	Ishigaki Is.	LC697940		LC698610	LC698837	LC699089
Spilomelinae	Sinomphisa_plagialis	(Wileman, 1911)	Margaroniini	P17-030	Yamaguchi	Akiyoshidai	LC697809	LC698028	LC698148	LC698696	LC698889
Spilomelinae	Spoladea_recurvalis	(Fabricius, 1775)	Hymeniini	P19-59	Okinawa	Ishigaki Is.	LC697948	LC698118	LC698617	LC698844	LC699093
Spilomelinae	Syllepte_fuscoinvalidalis	Yamanaka, 1959	unplaced	P18-23	Tottori	Iwami	LC697887	LC698078	LC698555	LC698786	LC699043
Spilomelinae	Syllepte_fuscomarginalis	(Leech, 1889)	Spilomelini	P17-101	Tottori	Saji	LC697835	LC698051	LC698174	LC698718	LC698913
Spilomelinae	Syllepte_invalidalis	South, 1901	unplaced	P17-044	Shimane	Kusandao	LC697813	LC698032	LC698151	LC698700	LC698893
Spilomelinae	Syllepte_pallidinotalis	(Hampson, 1912)	unplaced	P18-15	Hokkaido	Shikishimanai	LC697881	LC698074	LC698549	LC698761	LC698948
Spilomelinae	Syllepte_segnalis	(Leech, 1889)	unplaced	P19-10	Tottori	Wakabadai	LC697927	LC698106	LC698646	LC698823	LC699077
Spilomelinae	Syllepte_taiwanalis	Shibuya, 1928	Spilomelini	P18-22	Tottori	Yazu	LC697886		LC698554	LC698785	LC699042
Spilomelinae	Talanga_nympha	(Butler, 1880)	Margaroniini	P20-14	Okinawa	Ishigaki Is.	LC697967	LC698128	LC698635		LC699131
Spilomelinae	Tatobotys_aurantialis	Hampson, 1897	Steniini	P17-150	Okinawa	Iriomote Is.	LC697852		LC698193	LC698871	LC698926
Spilomelinae	Togabotys_fuscolineatalis	Yamanaka, 1978	Wurthiini	P20-13	Tottori	Daisen	LC697966	LC698127	LC698634		LC699138
Spilomelinae	Tyspanodes_striata	(Butler, 1879)	Margaroniini	P18-13	Tottori	Sourokubara	LC697879	LC698072	LC698547	LC698759	LC698947
Spilomelinae	Udea_exigualis	(Wileman, 1911)	Udeini	P17-079	Nagano	Tateshina	LC697827	LC698047	LC698166		LC698907
Spilomelinae	Udea_nebulatalis	Inoue, Yamanaka & Sasaki, 2008	Udeini	P20-17	Tottori	Hyonosen	LC697970		LC698638		LC699134
Spilomelinae	Udea_testacea	(Butler, 1879)	Udeini	P19-72	Tottori	Tottori	LC597450		LC698623		LC699129
